# Supplementary material for: Multiple domains of bacterial and human Lon proteases define substrate selectivity
Source: PubMed Central journal article supplement (PMC6098112; doi:10.1038/s41426-018-0148-4), 2018-08-17
Supplement: 41426_2018_148_MOESM1_ESM.pdf [file 41426_2018_148_MOESM1_ESM.pdf]

## Multiple Domains of Bacterial and Human Lon Proteases Define Substrate Selectivity

Lihong He<sup>1</sup>, Dongyang Luo<sup>2</sup>, Fan Yang<sup>3</sup>, Chunhao Li<sup>4</sup>, Xuegong Zhang<sup>2</sup>, Haiteng Deng<sup>3</sup>, and Jing-Ren Zhang<sup>1, 5\*</sup>

### List of the supplementary figures and tables

**Figure S1.** Detection of protein stability in the presence of the proteolytically inactive Lon.

**Figure S2.** *In vitro* degradation of common substrates by the bacterial and human Lon variants.

**Figure S3.** Amino acid frequency at the cleavage sites within Lon common substrates.

**Figure S4.** Construction and *in vivo* degradation of the HU $\beta$  variants.

**Figure S5.** Schematic illustration for construction of the Lon proteases and their variants.

**Figure S6.** The amount of protein in the presence of the domain swap mutants between eLon and hLon.

**Figure S7.** Examples for amino acids surrounding Lon cleavage site and data input format in *Seq2logo*.

**Figure S8.** CD spectra of heat-treated and untreated HU $\beta$  and BSA.

**Table S1.** Bacterial strains and plasmids used in this study.

**Table S2.** Primers used in this study.

**Table S3.** The materials and conditions for production of recombinant target proteins.

**Table S4.** The biochemical characteristics of *Francisella* Lon substrates.

**Table S5.** Lon substrates  $\alpha$ -casein-, RpsB-, SulA-, and HU $\beta$ -derived peptides identified in MS. (as individual files)

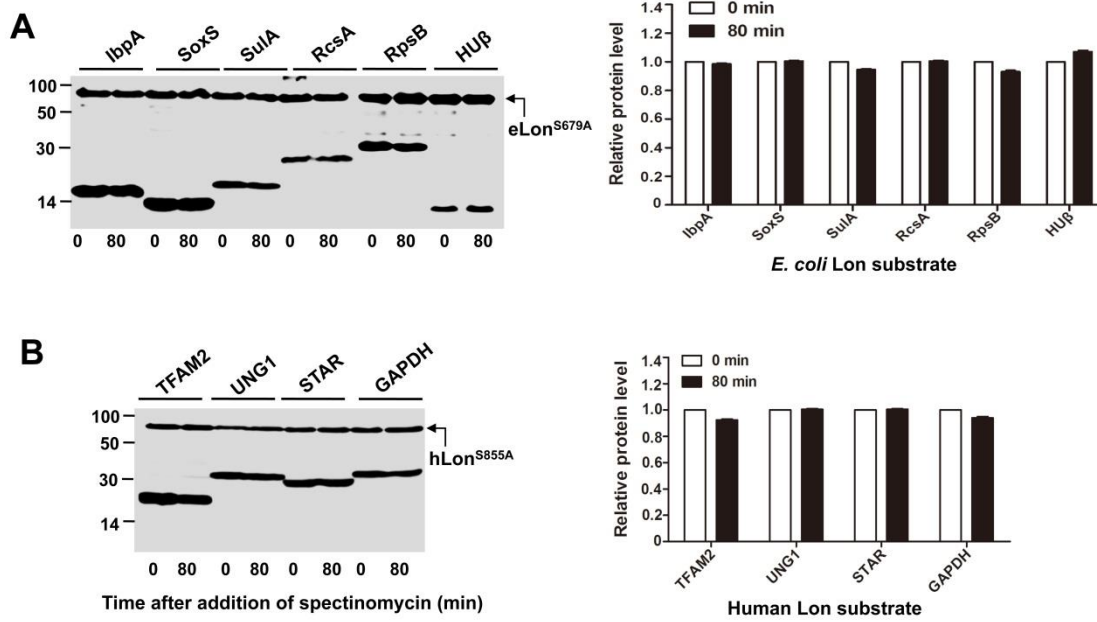

**Figure S1.** Detection of protein stability in the presence of the proteolytically inactive Lon. (A) Stability of the *E. coli* Lon substrates was detected in the presence of eLon<sup>S679A</sup>. (B) Stability of the human Lon substrates was detected in the presence of hLon<sup>S855A</sup>. Protein detection and quantification were carried out as in Fig. 1.

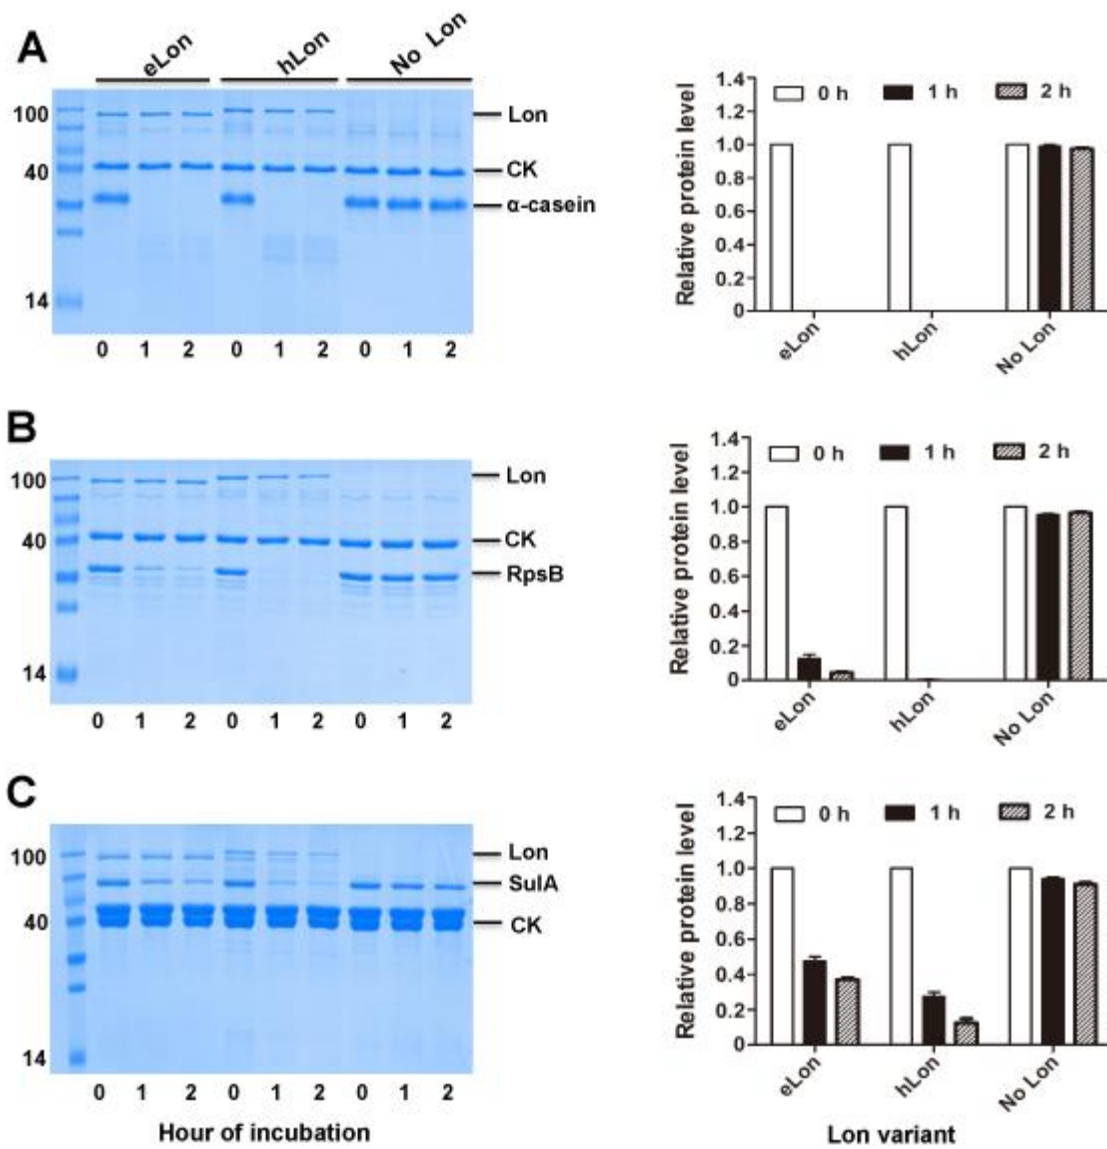

**Figure S2.** *In vitro* degradation of common substrates by the bacterial and human Lon variants.  $\alpha$ -casein (A) and recombinant RpsB (B) and SulA (C) (15  $\mu$ g) was incubated at 37  $^{\circ}$ C with the Lon protease (10  $\mu$ g) of *E. coli* (eLon) or human (hLon). The proteins in the reactions were detected by SDS-PAGE and Coomassie Brilliant staining at 0, 1 and 2 h as in Fig. 7. Protein was quantified by Image Lab and presented as relative value to the sample taken at 0 hour as in Fig. 7 (left panel of A, B and C).

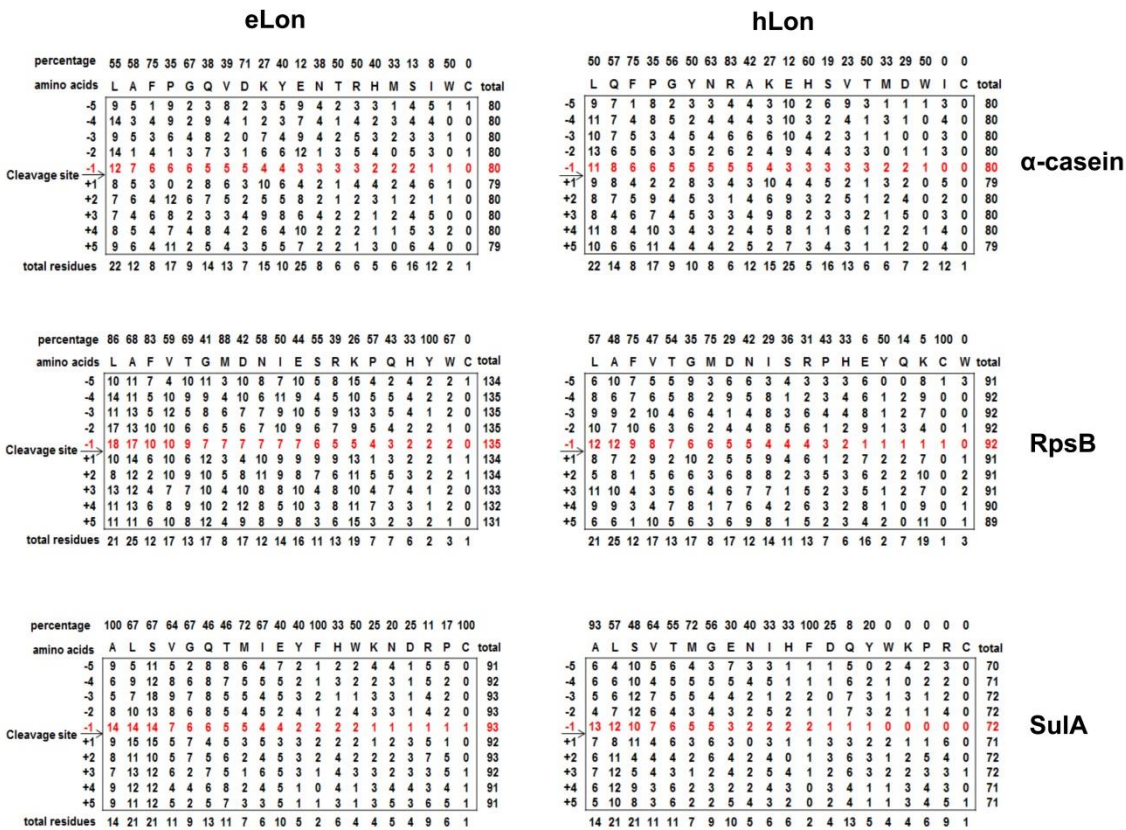

**Figure S3.** Amino acid frequency at the cleavage sites within Lon common substrates. A Python script was used to calculate the amino acids surrounding the cleavage site. The total number of amino acid residues at the P (-5) to P (-1) and P (+1) to P (+5) positions within α-casein, RpsB, and SulA are shown in tabular form. Percentage refers to ratio of total number of amino acid residues at P (-1) position to that in α-casein, RpsB, and SulA protein sequence, respectively (shown as total residues). Total refers to the total number of amino acid residues in each position.

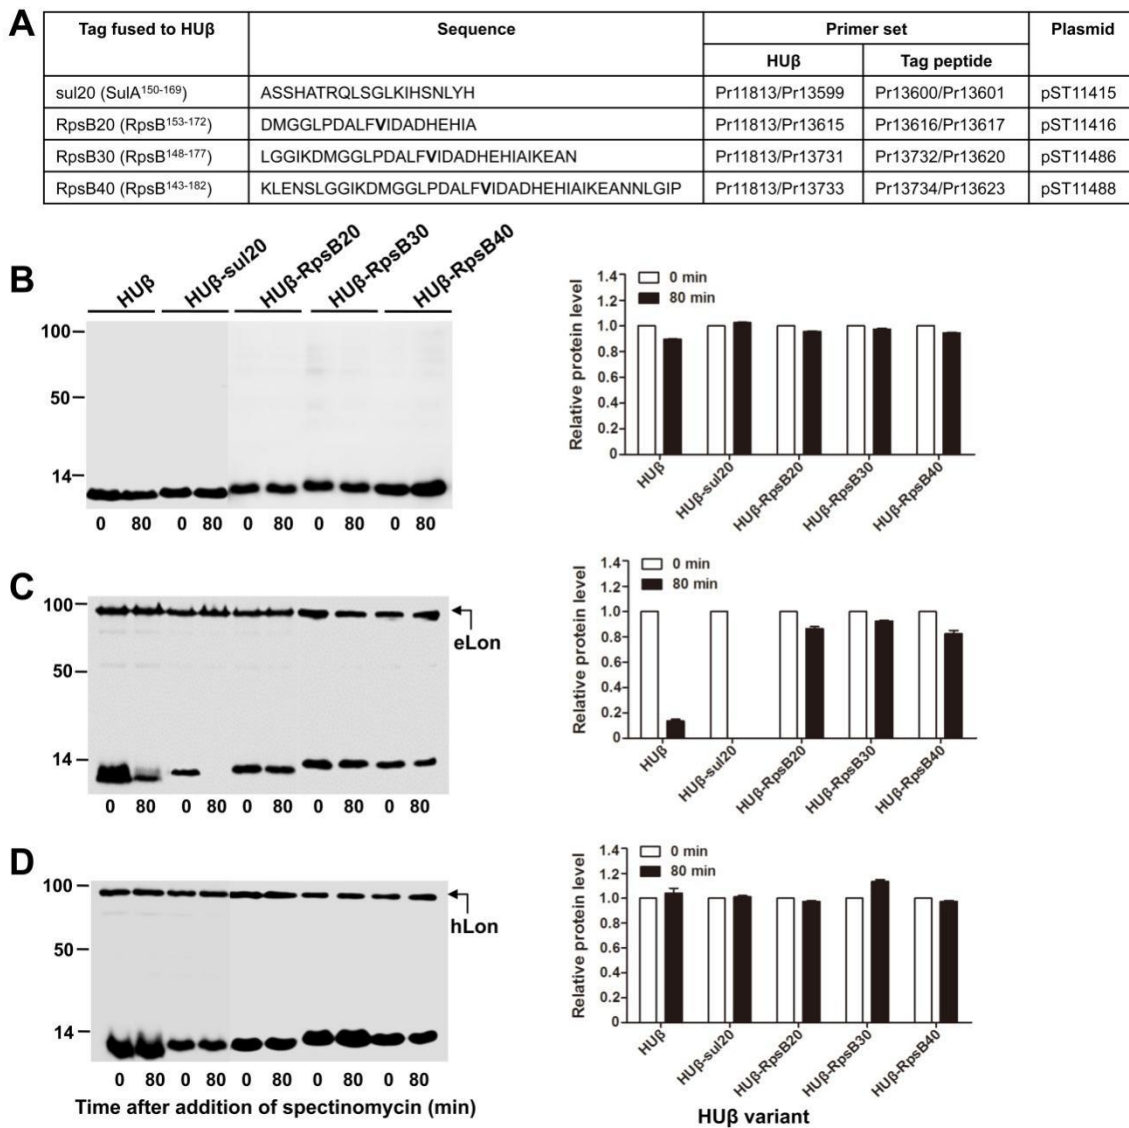

**Figure S4.** Construction and *in vivo* degradation of the HUβ variants. The tag sequences, primers and resulting plasmids were listed in (A). The bold-face letter shows amino acid Val<sup>163</sup> which was the most abundantly cleaved site in the hLon-treated RpsB. Stability of the HUβ variants was detected in the absence (B) or presence of eLon (C) or hLon (D) as in Fig 3.

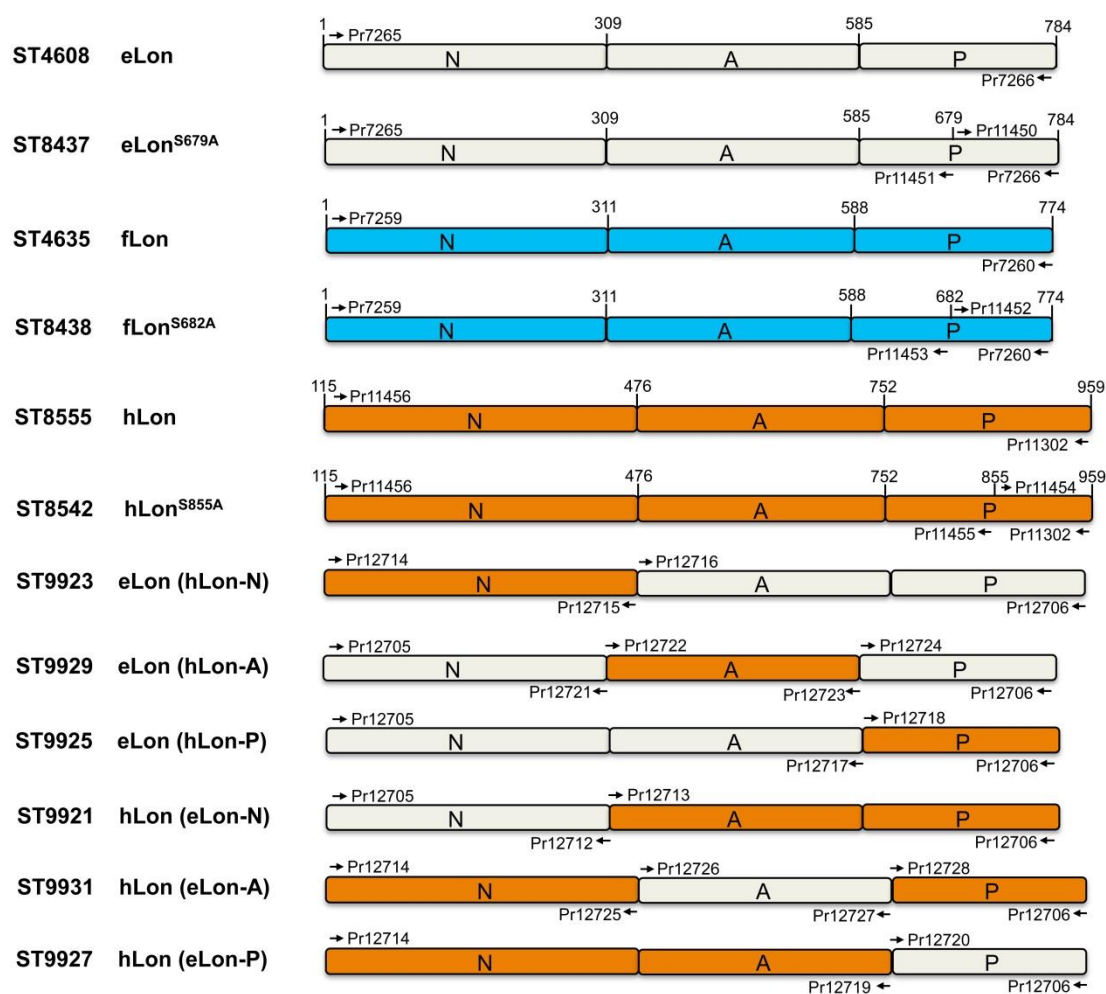

**Figure S5.** Schematic illustration for construction of the Lon proteases and their variants. Bacterial and human Lon consist of three domains: an N-terminal domain (N domain), a central ATPase domain (A domain) and a C-terminal proteolytic domain (P domain). These domains in eLon, fLon, or hLon are drawn in gray, blue, or orange, respectively. The range of each domain is indicated above the diagram. The hLon was constructed in truncated form lacking amino acids 1-114 of the predicted mitochondrial targeting sequence (MTS). The primer set used for construction of Lon proteases and their variants and the resulting plasmids are listed. The Lon domain swap mutants are designated following the principle, for example, eLon (hLon-N) represent that the N domain of eLon was replaced by the equivalent domain of hLon.

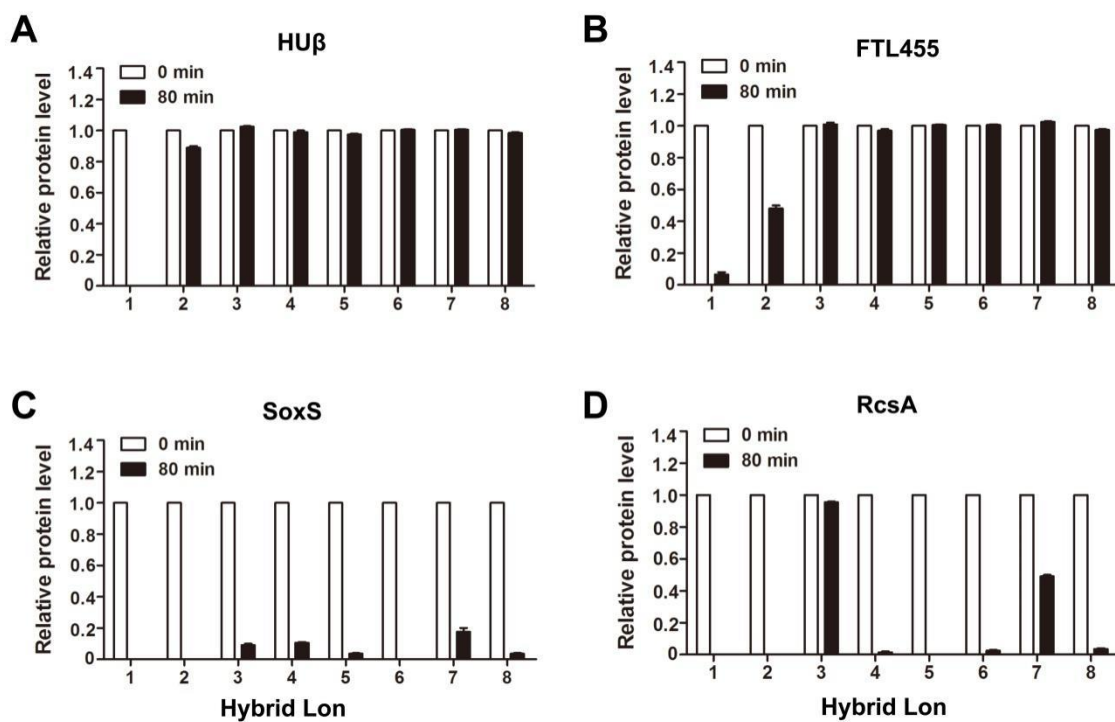

**Figure S6.** The amount of protein in the presence of the domain swap mutants between eLon and hLon. Bands from the Fig. 8 were quantified. The amount of HUβ (A), FTL455 (B), SoxS (C), and RcsA (D) were detected as in Fig. 1.

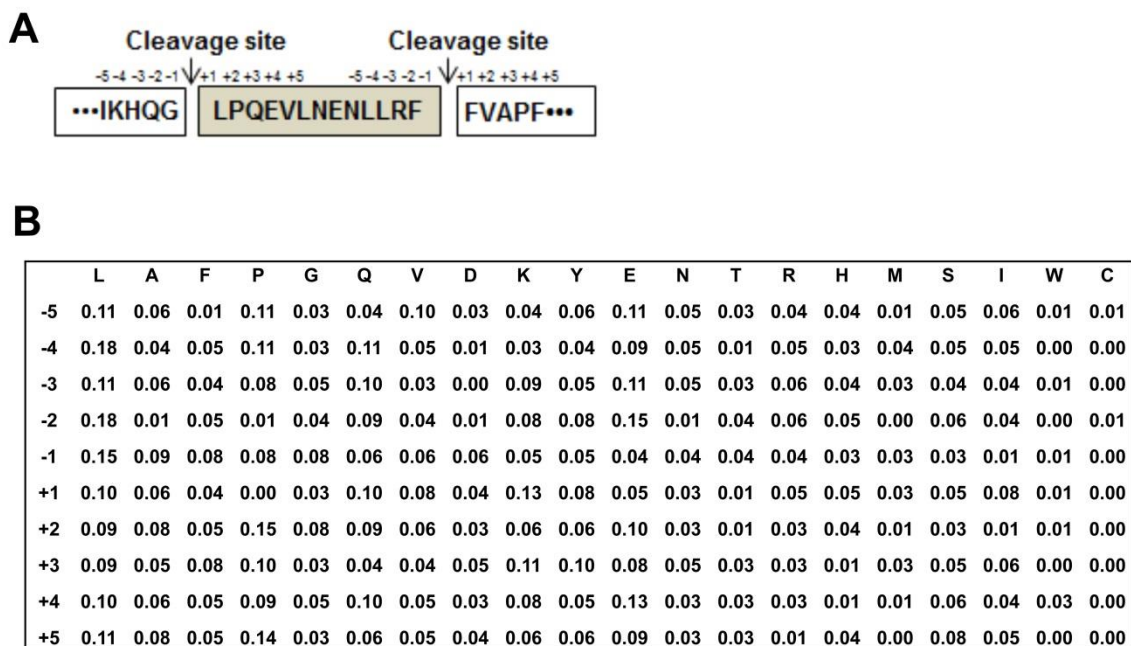

**Figure S7.** Examples for amino acids surrounding Lon cleavage site and data input format in *Seq2logo*. One peptide from  $\alpha$ -casein was listed and the amino acids surrounding cleavage site were labeled in (A). The frequency format of eLon-treated  $\alpha$ -casein was presented in (B). It is characterized by having a header line containing all the amino acids, and a header column containing the given positions. The numbers in 20 columns represent the amino acid frequency in each position.



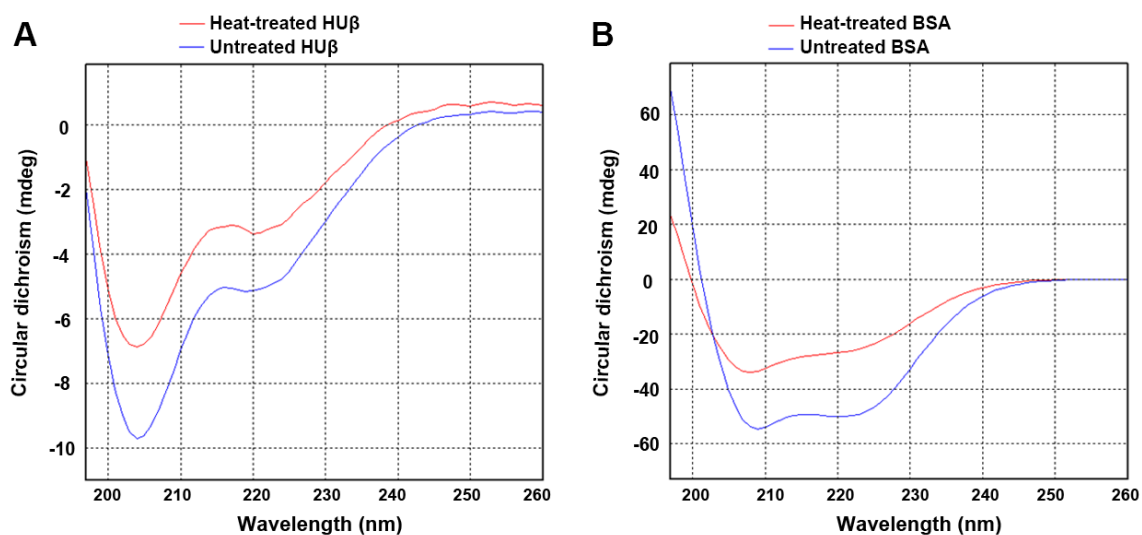

**Figure S8.** CD spectra of heat-treated and untreated HU $\beta$  and BSA. Spectra of heat-treated and untreated BSA and purified HU $\beta$  (0.2 mg/ml) in Tris buffer (2 mM Tris, 2 mM NaCl, pH 8.0) were recorded in a Chirascan<sup>TM</sup>-plus CD Spectrometer. The red and blue lines represent the spectrum of heat-treated and untreated HU $\beta$  (A) and BSA (B), respectively.

**Table S1. Bacterial strains and plasmids used in this study**

| Strain or plasmid                                            | Description                                                                                                                                                                                                    | Antibiotic resistance <sup>1</sup> | Reference or source     |
|--------------------------------------------------------------|----------------------------------------------------------------------------------------------------------------------------------------------------------------------------------------------------------------|------------------------------------|-------------------------|
| <b><i>F. tularensis</i> subsp. <i>holarctica</i> strains</b> |                                                                                                                                                                                                                |                                    |                         |
| LVS                                                          | Live vaccine strain                                                                                                                                                                                            |                                    | 1                       |
| ST1120                                                       | LVS derivative, $\Delta lon$                                                                                                                                                                                   |                                    | This study              |
| <b><i>E. coli</i> strains</b>                                |                                                                                                                                                                                                                |                                    |                         |
| DH5 $\alpha$                                                 | F <sup>-</sup> <i>endA1 glnV44 thi-1 recA1 relA1 gyrA96 deoR nupG</i> $\Phi 80dlacZ\Delta M15 \Delta(lacZYA-argF)U169$ , <i>hsdR17</i> (r <sub>K</sub> <sup>-</sup> m <sub>K</sub> <sup>+</sup> ), $\lambda$ - |                                    | Biomed (Beijing, China) |
| ER2566                                                       | F- $\lambda$ - <i>fhuA2 [lon] ompT lacZ::T7 gene 1 gal sulA11</i> $\Delta(mcrC-mrr)114::IS10R(mcr-73::miniTn10-TetS)2$ <i>R(zgb-210::Tn10)(TetS) endA1 [dcm]</i>                                               |                                    | NEB                     |
| MG1655                                                       | <i>K-12 F- <math>\lambda</math>- ilvG- rfb-50 rph-1</i>                                                                                                                                                        |                                    | Biomed                  |
| <b>Plasmids</b>                                              |                                                                                                                                                                                                                |                                    |                         |
| pACYCDuet-1                                                  | <i>E. coli</i> protein expression vector                                                                                                                                                                       | Cm <sup>R</sup>                    | Novagen                 |
| pBAD18                                                       | <i>E. coli</i> protein expression vector                                                                                                                                                                       | Amp <sup>R</sup>                   | 2                       |
| pEDL17                                                       | <i>Francisella-E. coli</i> shuttle plasmid                                                                                                                                                                     | Hyg <sup>R</sup>                   | 3                       |
| pST4608                                                      | pBAD18::eLon                                                                                                                                                                                                   | Amp <sup>R</sup>                   | This study              |
| pST4609                                                      | pACYCDuet-1::FTL663                                                                                                                                                                                            | Cm <sup>R</sup>                    | 4                       |
| pST4611                                                      | pACYCDuet-1::FTL1957                                                                                                                                                                                           | Cm <sup>R</sup>                    | 4                       |
| pST4635                                                      | pBAD18::fLon                                                                                                                                                                                                   | Amp <sup>R</sup>                   | 4                       |
| pST5005                                                      | pACYCDuet-1::FTL127                                                                                                                                                                                            | Cm <sup>R</sup>                    | This study              |
| pST5007                                                      | pACYCDuet-1::FTL578                                                                                                                                                                                            | Cm <sup>R</sup>                    | 4                       |
| pST5009                                                      | pACYCDuet-1::FTL1217                                                                                                                                                                                           | Cm <sup>R</sup>                    | 4                       |
| pST5010                                                      | pACYCDuet-1::FTL1218                                                                                                                                                                                           | Cm <sup>R</sup>                    | This study              |
| pST7524                                                      | pACYCDuet-1::FTL160                                                                                                                                                                                            | Cm <sup>R</sup>                    | This study              |
| pST7525                                                      | pACYCDuet-1::FTL196                                                                                                                                                                                            | Cm <sup>R</sup>                    | This study              |
| pST7526                                                      | pACYCDuet-1::FTL316                                                                                                                                                                                            | Cm <sup>R</sup>                    | This study              |
| pST7527                                                      | pACYCDuet-1::FTL455                                                                                                                                                                                            | Cm <sup>R</sup>                    | This study              |
| pST7528                                                      | pACYCDuet-1::FTL499                                                                                                                                                                                            | Cm <sup>R</sup>                    | This study              |
| pST7529                                                      | pACYCDuet-1::FTL528                                                                                                                                                                                            | Cm <sup>R</sup>                    | This study              |
| pST7530                                                      | pACYCDuet-1::FTL714                                                                                                                                                                                            | Cm <sup>R</sup>                    | This study              |
| pST7531                                                      | pACYCDuet-1::FTL964                                                                                                                                                                                            | Cm <sup>R</sup>                    | This study              |
| pST7532                                                      | pACYCDuet-1::FTL965                                                                                                                                                                                            | Cm <sup>R</sup>                    | This study              |
| pST7533                                                      | pACYCDuet-1::FTL975                                                                                                                                                                                            | Cm <sup>R</sup>                    | This study              |
| pST7534                                                      | pACYCDuet-1::FTL995                                                                                                                                                                                            | Cm <sup>R</sup>                    | This study              |
| pST7535                                                      | pACYCDuet-1::FTL1003                                                                                                                                                                                           | Cm <sup>R</sup>                    | This study              |
| pST7536                                                      | pACYCDuet-1::FTL1034                                                                                                                                                                                           | Cm <sup>R</sup>                    | This study              |
| pST7537                                                      | pACYCDuet-1::FTL1136                                                                                                                                                                                           | Cm <sup>R</sup>                    | This study              |

|         |                               |                  |            |
|---------|-------------------------------|------------------|------------|
| pST7538 | pACYCDuet-1::FTL1167          | Cm <sup>R</sup>  | This study |
| pST7539 | pACYCDuet-1::FTL1216          | Cm <sup>R</sup>  | This study |
| pST7540 | pACYCDuet-1::FTL1244          | Cm <sup>R</sup>  | This study |
| pST7541 | pACYCDuet-1::FTL1566          | Cm <sup>R</sup>  | This study |
| pST7542 | pACYCDuet-1::FTL1644          | Cm <sup>R</sup>  | This study |
| pST7543 | pACYCDuet-1::FTL1917          | Cm <sup>R</sup>  | This study |
| pST7544 | pACYCDuet-1::FTL1923          | Cm <sup>R</sup>  | This study |
| pST7545 | pACYCDuet-1::FTL1935          | Cm <sup>R</sup>  | This study |
| pST7975 | pEDL17::FTL196                | Hyg <sup>R</sup> | This study |
| pST7976 | pEDL17::FTL316                | Hyg <sup>R</sup> | This study |
| pST7977 | pEDL17::FTL455                | Hyg <sup>R</sup> | This study |
| pST7978 | pEDL17::FTL964                | Hyg <sup>R</sup> | This study |
| pST7979 | pEDL17::FTL1003               | Hyg <sup>R</sup> | This study |
| pST7980 | pEDL17::FTL1034               | Hyg <sup>R</sup> | This study |
| pST7981 | pEDL17::FTL1167               | Hyg <sup>R</sup> | This study |
| pST7982 | pEDL17::FTL1216               | Hyg <sup>R</sup> | This study |
| pST7983 | pEDL17::FTL1935               | Hyg <sup>R</sup> | This study |
| pST7984 | pEDL17::FTL1218               | Hyg <sup>R</sup> | This study |
| pST7985 | pEDL17::FTL965                | Hyg <sup>R</sup> | This study |
| pST7986 | pEDL17::FTL995                | Hyg <sup>R</sup> | This study |
| pST7987 | pEDL17::FTL1566               | Hyg <sup>R</sup> | This study |
| pST7988 | pACYCDuet-1::lbpA             | Cm <sup>R</sup>  | This study |
| pST7989 | pACYCDuet-1::SoxS             | Cm <sup>R</sup>  | This study |
| pST7990 | pACYCDuet-1::SulA             | Cm <sup>R</sup>  | This study |
| pST7991 | pACYCDuet-1::RcsA             | Cm <sup>R</sup>  | This study |
| pST8437 | pBAD18::eLon <sup>S679A</sup> | Amp <sup>R</sup> | This study |
| pST8438 | pBAD18::fLon <sup>S682A</sup> | Amp <sup>R</sup> | This study |
| pST8542 | pBAD18::hLon <sup>S855A</sup> | Amp <sup>R</sup> | This study |
| pST8555 | pBAD18::hLon                  | Amp <sup>R</sup> | This study |
| pST8721 | pACYCDuet-1::GAPDH            | Cm <sup>R</sup>  | This study |
| pST8967 | pMAL-p2X::SulA                | Amp <sup>R</sup> | This study |
| pST8968 | pACYCDuet-1::RpsB             | Cm <sup>R</sup>  | This study |
| pST8969 | pACYCDuet-1::HUβ              | Cm <sup>R</sup>  | This study |
| pST9320 | pACYCDuet-1::TFAM2            | Cm <sup>R</sup>  | This study |
| pST9321 | pACYCDuet-1::UNG1             | Cm <sup>R</sup>  | This study |
| pST9322 | pACYCDuet-1::STAR             | Cm <sup>R</sup>  | This study |
| pST9921 | pBAD18::hLon (eLon-N)         | Amp <sup>R</sup> | This study |
| pST9923 | pBAD18::eLon (hLon-N)         | Amp <sup>R</sup> | This study |
| pST9925 | pBAD18::eLon (hLon-P)         | Amp <sup>R</sup> | This study |
| pST9927 | pBAD18::hLon (eLon-P)         | Amp <sup>R</sup> | This study |
| pST9929 | pBAD18::eLon (hLon-A)         | Amp <sup>R</sup> | This study |

|          |                         |                  |            |
|----------|-------------------------|------------------|------------|
| pST9931  | pBAD18::hLon (eLon-A)   | Amp <sup>R</sup> | This study |
| pST11415 | pACYCDuet-1::HUβ-sul20  | Cm <sup>R</sup>  | This study |
| pST11416 | pACYCDuet-1::HUβ-RpsB20 | Cm <sup>R</sup>  | This study |
| pST11486 | pACYCDuet-1::HUβ-RpsB30 | Cm <sup>R</sup>  | This study |
| pST11488 | pACYCDuet-1::HUβ-RpsB40 | Cm <sup>R</sup>  | This study |

<sup>1</sup>Antibiotic resistance: Amp<sup>R</sup>, ampicillin; Cm<sup>R</sup>, chloramphenicol; Hyg<sup>R</sup>, hygromycin.

**Table S2. Primers used in this study**

| <b>Primer</b> | <b>Sequence (5'-3')</b>                                |
|---------------|--------------------------------------------------------|
| Pr1423        | TACCTGACGCTTTTTATCGCAACT                               |
| Pr1424        | GAGTTCGGCATGGGGTCAG                                    |
| Pr7259        | CGGAATTCAGGAGGATTACATATGTCAGAACCCCTAAATGTCGTT          |
| Pr7260        | GGGGTACCCTAATGATGATGATGGTGTGAAAACTCTCTCTAAAACCTCTT     |
| Pr7265        | CGGAATTCAGGAGGATTACATATGAATCCTGAGCGTTCTGAACG           |
| Pr7266        | GGGGTACCCTAATGATGATGATGGTGTGTTTTGCAGTCACAACCTGCA       |
| Pr7753        | CATGCCATGGGCCATAATGATATTAGCGAGTATTT                    |
| Pr7754        | GCGTCGACCTAATGATGATGATGGTGTGATAATTTTCTTATTTGTATCTAA    |
| Pr7757        | CATGCCATGGGCAAGATATTATGTATTTTATATG                     |
| Pr7758        | CGGAATTCCTAATGATGATGATGGTGTGACTATAAGTTAAATTGAGCTCTT    |
| Pr10874       | CATGCCATGGGCCTTTTAATAAATTGTGATTTAGGA                   |
| Pr10875       | CGGAATTCCTAATGATGATGATGGTGTGAAAGCAATCCTCACCAGCAATTT    |
| Pr10876       | CATGCCATGGGCCAATACACTCTAAAACAAATATCC                   |
| Pr10877       | CGGAATTCCTAATGATGATGATGGTGTGAAAGATCTATGTTGAGGCTTTTAGC  |
| Pr10878       | CATGCCATGGGCATAAAAAGTATTTGGAATAAATAAT                  |
| Pr10880       | CATGCCATGGGCAATTTTAATAAATCTCTCTACTAT                   |
| Pr10881       | CGGAATTCCTAATGATGATGATGGTGTGATCTAAATTATTACTACTTTGCC    |
| Pr10882       | CATGCCATGGGCATCATTCAAATACTACAGCTATC                    |
| Pr10883       | CGGAATTCCTAATGATGATGATGGTGTGATTTACTACCTCGACTACTTCACC   |
| Pr10884       | CATGCCATGGGCCTATTTGAAAAACAACAGTATCAA                   |
| Pr10886       | CATGCCATGGGCAGCCAGCTATCTCTTAATAAAAAG                   |
| Pr10887       | GCGTCGACCTAATGATGATGATGGTGTGACTAAATAACGGGCTTTTATGG     |
| Pr10888       | CATGCCATGGGCACACAAATAATGACTCCAAAAAC                    |
| Pr10889       | CGGAATTCCTAATGATGATGATGGTGTGATAGAAATATATTGACTTAGATCTTT |
| Pr10890       | CATGCCATGGGCGAAGCAATTAAGGAACTACTATT                    |
| Pr10891       | CGGAATTCCTAATGATGATGATGGTGTGTCCTTTTTTATTTTCTAAACTTTC   |
| Pr10892       | CGGGATCCGGCTTTAAAATTGCAGATATAGA                        |
| Pr10893       | GCGTCGACCTAATGATGATGATGGTGTGAAATTTATATAATGATTTTTTATAC  |
| Pr10894       | CATGCCATGGGCCTTTTACCTGTACATAAAAATAC                    |
| Pr10895       | CGGAATTCCTAATGATGATGATGGTGTGATCTAACTCAATATTTCTAACATC   |
| Pr10896       | CATGCCATGGGCATATATACTATTTTTTAGAATG                     |
| Pr10897       | CGGAATTCCTAATGATGATGATGGTGTGCCATTTTGCATCTTCTTCTAGTTT   |
| Pr10898       | CATGCCATGGGCTCACATAAGTCTGATTTAATTGC                    |
| Pr10900       | CATGCCATGGGCCAAATTCATATAATTGATATTCAC                   |
| Pr10902       | CATGCCATGGGCTTAAATATTATAAATGACTCCTTA                   |
| Pr10903       | CGGAATTCCTAATGATGATGATGGTGTGAGATGTTTTACATTTATTTGTCC    |
| Pr10904       | CATGCCATGGGCTATCAAATCATAAAAAGTGAAATT                   |
| Pr10905       | CGGAATTCCTAATGATGATGATGGTGTGGCAATTACCTGTATTTCTATTAA    |

|         |                                                       |
|---------|-------------------------------------------------------|
| Pr10908 | CATGCCATGGGCACAACTTAGAAATATGTGTAGA                    |
| Pr10909 | CGGAATTCCTAATGATGATGATGGTGATGATTGTTAAGCTTTGATTTTATTG  |
| Pr10910 | CATGCCATGGGCTCAAAGATTTTCATCTTAGCTATAG                 |
| Pr10911 | GCGTCGACCTAATGATGATGATGGTGATGACTATAAACTCTGCCCAAGCCTT  |
| Pr10912 | CATGCCATGGGCAAACCTTTAAAATACTTATCGAT                   |
| Pr10913 | CGGAATTCCTAATGATGATGATGGTGATGTCGATTTTGTATCATCAATAACCA |
| Pr10914 | CATGCCATGGGCCCTGCGCAATATCACATTGGAAC                   |
| Pr10915 | CGGAATTCCTAATGATGATGATGGTGATGTGTTGTAGTTGTATACTCTGCGG  |
| Pr10916 | CATGCCATGGGCATTAATGCTCTAACTTGGTGATT                   |
| Pr10917 | CGGAATTCCTAATGATGATGATGGTGATGAACACAAATATCCTCCTGTAAACA |
| Pr10928 | CATGCCATGGGCGTAATGACTTTTAATGCCAATGGT                  |
| Pr10929 | GCGTCGACCTAATGATGATGATGGTGATGAACCTCATAATCATAATTAATAG  |
| Pr10930 | GCGTCGACCTAATGATGATGATGGTGATGACCCCATTTTTCTTCATACTCTTT |
| Pr10931 | GCGTCGACCTAATGATGATGATGGTGATGTTTTTGGTACTCCTGTAAAATATT |
| Pr10932 | GCGTCGACCTAATGATGATGATGGTGATGTATCCCCCTACTAATATCTATTTT |
| Pr10933 | GCGTCGACCTAATGATGATGATGGTGATGTGAGTTAGCAAGTTCTGGGATATG |
| Pr11189 | CGACGCGTTTGCAATACACTCTAAAACAAATATCC                   |
| Pr11190 | CCCCCGGGCTAATGATGATGATGGTGATGAAGATCTATGTTGAGGCTTTTAGC |
| Pr11191 | CGACGCGTATGATAAAAGTATTTGGAATAAATAAT                   |
| Pr11192 | CCCCCGGGCTAATGATGATGATGGTGATGACCCCATTTTTCTTCATACTCTTT |
| Pr11193 | CGACGCGTATGAATTTTAATAAATCTCTCTACTAT                   |
| Pr11194 | CCCCCGGGCTAATGATGATGATGGTGATGATCTAAATTATTACTACTTTGCC  |
| Pr11195 | CGACGCGTATGACACAAATAATGACTCCAAAAAC                    |
| Pr11196 | CCCCCGGGCTAATGATGATGATGGTGATGTAGAATATATTGACTTAGATCTTT |
| Pr11197 | CGACGCGTATGATATATATACTATTTTTTAGAATG                   |
| Pr11198 | CCCCCGGGCTAATGATGATGATGGTGATGCCATTTTGCATCTTCTTCTAGTTT |
| Pr11199 | AGTGGCGCGCCATGTCACATAAGTCTGATTTAATTGC                 |
| Pr11200 | CCCCCGGGCTAATGATGATGATGGTGATGTATCCCCCTACTAATATCTATTTT |
| Pr11201 | CGACGCGTATGTTAAATATTATAAATGACTCCTTA                   |
| Pr11202 | CCCCCGGGCTAATGATGATGATGGTGATGAGATGTTTTTACATTTATTTGTCC |
| Pr11203 | CGACGCGTATGTATCAAATCATAAAAGTGAAATT                    |
| Pr11204 | CCCCCGGGCTAATGATGATGATGGTGATGGCAATTACCTGTATTTCTATTAA  |
| Pr11205 | AGTGGCGCGCCATGATTAATGCTCTAACTTGGTGATT                 |
| Pr11206 | CCCCCGGGCTAATGATGATGATGGTGATGAACACAAATATCCTCCTGTAAACA |
| Pr11207 | CGACGCGTATGCATAATGATATTAGCGAGTATTT                    |
| Pr11208 | CCCCCGGGCTAATGATGATGATGGTGATGTATAATTTTCTTATTTGTATCTAA |
| Pr11209 | CGACGCGTATGGAAGCAATTAAAGGAACTACTATT                   |
| Pr11210 | CCCCCGGGCTAATGATGATGATGGTGATGTCCTTTTTTATTTTCTAACTTTT  |
| Pr11211 | CGACGCGTATGCTTTTACCTGTACATAAAAAATAC                   |
| Pr11212 | CCCCCGGGCTAATGATGATGATGGTGATGATCTAACTCAATATTTCTAACATC |
| Pr11213 | CGACGCGTATGACAACTTAGAAATATGTGTAGA                     |

|         |                                                      |
|---------|------------------------------------------------------|
| Pr11214 | CCCCCGGGCTAATGATGATGATGGTGATGATTGTTAAGCTTTGATTTTATTG |
| Pr11215 | CATGCCATGGGCCGTAACCTTTGATTTATCCCCGCT                 |
| Pr11216 | GCGTCGACCTAATGATGATGATGGTGATGGTTGATTTGATACGGCGCGGTT  |
| Pr11217 | CATGCCATGGGCTCCCATCAGAAAATTATTCAGGA                  |
| Pr11218 | GCGTCGACCTAATGATGATGATGGTGATGCAGGCGGTGGCGATAATCGCTGG |
| Pr11219 | CATGCCATGGGCTACACTTCAGGCTATGCACATCG                  |
| Pr11220 | GCGTCGACCTAATGATGATGATGGTGATGATGATACAAATTAGAGTGAATTT |
| Pr11221 | CATGCCATGGGCTCAACGATTATTATGGATTTATG                  |
| Pr11222 | GCGTCGACCTAATGATGATGATGGTGATGGCGCATGTTGACAAAAATACCAT |
| Pr11302 | GGGGTACCCTAATGATGATGATGGTGATGTTCCACGGCCAGCGCCTCTGC   |
| Pr11450 | CGACGCCGAAAGATGGTCCGGCTGCCGGTATTGCTATGTGCA           |
| Pr11451 | TGCACATAGCAATACCGGCAGCCGACCATCTTTCGGCGTGC            |
| Pr11452 | CTACACCAAAAGATGGTCCAGCTGCTGGTATTGCGATGACAA           |
| Pr11453 | TTGTCATCGCAATACCAGCAGCTGGACCATCTTTTGGTGTAG           |
| Pr11454 | CCACCCCAAGGACGGCCAGCCGAGGCTGCACCATCGTCA              |
| Pr11455 | TGACGATGGTGCAGCCTGCGGCTGGGCCGTCTTGGGGGTGG            |
| Pr11456 | CGGAATTCAGGAGGATTACATATGACGATCCCCGATGTGTTCCGCAC      |
| Pr11626 | CGGAATTCATGGGGAAGGTGAAGGTCGGAG                       |
| Pr11627 | GCGTCGACCTAATGATGATGATGGTGATGCTCCTTGGAGGCCATGTGGG    |
| Pr11809 | CGGGATCCATGTACTTCAGGCTATGCACAT                       |
| Pr11810 | CCAAGCTTTTAATGATACAAATTAGAGTGAATT                    |
| Pr11811 | CATGCCATGGGCGCAACTGTTTCCATGCGCGACATG                 |
| Pr11812 | GCGTCGACCTAATGATGATGATGGTGATGCTCAGCTTCTACGAAGCTTTCT  |
| Pr11813 | CATGCCATGGGCGTGAATAAATCTCAATTGATCGAC                 |
| Pr11814 | GCGTCGACCTAATGATGATGATGGTGATGGTTTACC GCGTCTTTCAGTGCT |
| Pr12088 | CATGCCATGGGCGCTTTTCTGCGTAGTATGTGGG                   |
| Pr12089 | GCGTCGACCTAATGATGATGATGGTGATGACACTTCTGCGCCGTATT      |
| Pr12090 | CATGCCATGGGCGGCGTGTGTTTGTAGGGCCGTG                   |
| Pr12091 | GCGTCGACCTAATGATGATGATGGTGATGCAGCTCTTCCAGTCGATCG     |
| Pr12092 | CATGCCATGGGCTGCTGGCTACCTTCAAACGT                     |
| Pr12093 | GCGTCGACCTAATGATGATGATGGTGATGACAACGCGCTCAGATGCCG     |
| Pr12705 | CGGAATTCAGGAGGATTACATATGAATCC                        |
| Pr12706 | GGGGTACCCTAATGATGATGATGGTGATG                        |
| Pr12712 | CTGTGCCCGCGCCAGGTCCAGGTTGACCTTGCTACGCGCATTCCACGG     |
| Pr12713 | CCGTGGAATGCGCGTAGCAAGGTCAACCTGGACCTGGCGCGGGCACAG     |
| Pr12714 | CGGAATTCAGGAGGATTACATATGACGAT                        |
| Pr12715 | CTGCGCCTGACGCAGGTCTTTTTTCTCGTTGCTGTACTTGCCCCAAGG     |
| Pr12716 | CCTTGGGGCAAGTACAGCAACGAGAAAAAAGACCTGCGTCAGGCGCAG     |
| Pr12717 | CACGTCATACATGCGCTCCACGGTGAAACGCTGAACACCGAGATAGTC     |
| Pr12718 | GACTATCTCGGTGTTACGCGTTTACCCTGGAGCGCATGTATGACGTG      |
| Pr12719 | TTCGTTATCCGCGCGACCATAGTCGAACACGGGCTTCCCCACGAAGTC     |

|         |                                                         |
|---------|---------------------------------------------------------|
| Pr12720 | GACTTCGTGGGGAAGCCCGTGTTCGACTATGGTCGCGCGGATAACGAA        |
| Pr12721 | CTGTGCCCCGCGCCAGGTCCAGGTTGACCTTGCTACGCGCATTCCACGG       |
| Pr12722 | CCGTGGAATGCGCGTAGCAAGGTCAACCTGGACCTGGCGCGGGCACAG        |
| Pr12723 | TTCGTTATCCGCGCGACCATAGTCGAACACGGGCTTCCCCACGAAGTC        |
| Pr12724 | GACTTCGTGGGGAAGCCCGTGTTCGACTATGGTCGCGCGGATAACGAA        |
| Pr12725 | CTGCGCCTGACGCAGGTCTTTTTTCTCGTTGCTGTACTTGCCCCAAGG        |
| Pr12726 | CCTTGGGGCAAGTACAGCAACGAGAAAAAAGACCTGCGTCAGGCGCAG        |
| Pr12727 | CACGTCATACATGCGCTCCACGGTGAAACGCTGAACACCGAGATAGTC        |
| Pr12728 | GACTATCTCGGTGTTTACGCGTTTACCCTGGAGCGCATGTATGACGTG        |
| Pr13595 | CATGCCATGGGCGCAGAACC CGCGTCAGGAATTCGAA                  |
| Pr13596 | GCGTCGACCTAATGATGATGATGGTGTATGCAGACCCTGTTTCGCCAGACTTGC  |
| Pr13599 | CTCGTGGCGTGAGAGGATGCGTTTACC CGCGTCTTTCAGTG              |
| Pr13600 | CACTGAAAGACGCGGTAAACGCATCCTCTCACGCCACGAG                |
| Pr13601 | GCGTCGACCTAATGATGATGATGGTGTATG                          |
| Pr13615 | TCCGGCAGACCGCCCATGTCTTTACC CGCGTCTTTCAGTG               |
| Pr13616 | CACTGAAAGACGCGGTAAACGCATGGGCGGTCTGCCGGA                 |
| Pr13617 | GCGTCGACCTAATGATGATGATGGTGTATGAGCAATGTGTTTCGTGGTCAGCATC |
| Pr13620 | GCGTCGACCTAATGATGATGATGGTGTATGGTTTGCTTCTTTGATAGCAATGTG  |
| Pr13623 | GCGTCGACCTAATGATGATGATGGTGTATGCGGAATACCCAGGTTGTTTGCTTC  |
| Pr13731 | GCGCGGTCTCACCGGTTTACC CGCGTCTTTCAGTGCTTT                |
| Pr13732 | GCGCGGTCTCACTGGGCGGTATCAAAGACATGGGC                     |
| Pr13733 | GCGCGGTCTCAGTTTGTGTTACC CGCGTCTTTCAGTGCTTT              |
| Pr13734 | GCGCGGTCTCAAACTGGAAAACAGCCTGGGCGGT                      |



**Table S3. The materials and conditions for production of the recombinant proteins**

| Gene ID <sup>1</sup> | Description                                                | Abundance Ratio <sup>2</sup> | Primer set <sup>3</sup> , plasmid <sup>4</sup>        | Degradation <sup>5</sup> | Induction condition <sup>6</sup> |
|----------------------|------------------------------------------------------------|------------------------------|-------------------------------------------------------|--------------------------|----------------------------------|
| FTL528               | Type III restriction enzyme                                | 3.037                        | Pr10884/Pr10931, pST7529                              | No                       | 37 °C 220 rpm 0.5 h              |
| FTL1136              | Hypothetical protein                                       | 2.691                        | Pr10900/Pr10933, pST7537                              | No                       | 37 °C 220 rpm 2 h                |
| FTL499               | S-adenosylmethionine decarboxylase                         | 2.347                        | Pr10882/Pr10883, pST7528                              | No                       | 37 °C 220 rpm 0.5 h              |
| FTL127               | Formate dehydrogenase                                      | 2.243                        | Pr7757/Pr7758, pST5005                                | No                       | 37 °C 220 rpm 2 h                |
| FTL1218              | PAS fold family protein                                    | 2.217                        | Pr7753/Pr7754, pST5010;<br>Pr11207/Pr11208, pST7984   | Yes                      | 37 °C 220 rpm 1 h                |
| FTL1917              | 30S ribosomal protein S6                                   | 2.060                        | Pr10912/Pr10913, pST7543                              | No                       | 37 °C 220 rpm 2 h                |
| FTL316               | Arsenate reductase                                         | 1.966                        | Pr10878/Pr10930, pST7526;<br>Pr11191/Pr11192, pST7976 | Yes                      | 37 °C 220 rpm 0.5 h              |
| FTL1923              | Zinc carboxypeptidase family protein                       | 1.900                        | Pr10914/Pr10915, pST7544                              | No                       | 37 °C 220 rpm 0.5 h              |
| FTL196               | UDP-3-O-[3-hydroxymyristoyl] glucosamine N-acyltransferase | 1.856                        | Pr10876/Pr10877, pST7525;<br>Pr11189/Pr11190, pST7975 | Yes                      | 37 °C 220 rpm 0.5 h              |
| FTL1244              | Exodeoxyribonuclease III                                   | 1.842                        | Pr10928/Pr10929, pST7540                              | No                       | No expression                    |
| FTL160               | LamB/YcsF family protein                                   | 1.789                        | Pr10874/Pr10875, pST7524                              | No                       | Inclusion body                   |
| FTL1566              | CutC family protein                                        | 1.753                        | Pr10908/Pr10909, pST7541;<br>Pr11213/Pr11214, pST7987 | No                       | 37 °C 220 rpm 0.5 h              |
| FTL975               | Nif3 family protein                                        | 1.661                        | Pr10892/Pr10893, pST7533                              | No                       | 37 °C 220 rpm 2 h                |
| FTL1003              | DNA polymerase III subunit epsilon                         | 1.652                        | Pr10896/Pr10897, pST7535;<br>Pr11197/Pr11198, pST7979 | Yes                      | 37 °C 220 rpm 0.5 h              |
| FTL1935              | ABC transporter ATP-binding protein                        | 1.632                        | Pr10916/Pr10917, pST7545;<br>Pr11205/Pr11206, pST7983 | Yes                      | 16 °C 180 rpm 3 h                |
| FTL965               | ATP-dependent protease peptidase subunit                   | 1.616                        | Pr10890/Pr10891, pST7532;<br>Pr11209/Pr11210, pST7985 | No                       | 16 °C 180 rpm 3 h                |
| FTL1644              | Glycerol kinase                                            | 1.607                        | Pr10910/Pr10911, pST7542                              | No                       | 37 °C 220 rpm 0.5 h              |
| FTL995               | Haloacid dehalogenase                                      | 1.591                        | Pr10894/Pr10895, pST7534;<br>Pr11211/Pr11212, pST7986 | No                       | 37 °C 220 rpm 0.5 h              |
| FTL455               | Acetyltransferase                                          | 1.581                        | Pr10880/Pr10881, pST7527;<br>Pr11193/Pr11194, pST7977 | Yes                      | 37 °C 220 rpm 0.5 h              |
| FTL1034              | Sulfate                                                    | 1.570                        | Pr10898/Pr10932, pST7536;                             | Yes                      | 16 °C 180                        |

|                        |                                                       |       |                                                       |     |                     |
|------------------------|-------------------------------------------------------|-------|-------------------------------------------------------|-----|---------------------|
|                        | adenylyltransferase                                   |       | Pr11199/Pr11200, pST7980                              |     | rpm 3 h             |
| FTL714                 | D-3-phosphoglycerate dehydrogenase                    | 1.559 | Pr10886/Pr10887, pST7530                              | No  | Inclusion body      |
| FTL1216                | Hypothetical protein                                  | 1.531 | Pr10904/Pr10905, pST7539;<br>Pr11203/Pr11204, pST7982 | Yes | 37 °C 220 rpm 0.5 h |
| FTL1167                | Hypothetical protein                                  | 1.499 | Pr10902/Pr10903, pST7538;<br>Pr11201/Pr11202, pST7981 | Yes | 37 °C 220 rpm 1 h   |
| FTL964                 | ATP-dependent protease ATP-binding subunit HslU       | 1.493 | Pr10888/Pr10889, pST7531;<br>Pr11195/Pr11196, pST7978 | Yes | 37 °C 220 rpm 1 h   |
| b169, <i>rpsB</i>      | 30S ribosomal subunit protein S2                      |       | Pr11811/Pr11812, pST8968                              | No  | 37 °C 220 rpm 0.5 h |
| b440, <i>hupB</i>      | DNA-binding protein HUβ                               |       | Pr11813/Pr11814, pST8969                              | Yes | 37 °C 220 rpm 0.5 h |
| b958, <i>sulA</i>      | SOS cell division inhibitor                           |       | Pr11219/Pr11220, pST7990                              | Yes | 37 °C 220 rpm 0.5 h |
| b1951, <i>rcaA</i>     | Positive regulator of capsule biosynthesis            |       | Pr11221/Pr11222, pST7991                              | Yes | 37 °C 220 rpm 0.5 h |
| b3687, <i>ibpA</i>     | Heat shock chaperone                                  |       | Pr11215/Pr11216, pST7988                              | No  | 37 °C 220 rpm 0.5 h |
| b4062, <i>soxS</i>     | Regulator of superoxide response regulon              |       | Pr11217/Pr11218, pST7989                              | Yes | 37 °C 220 rpm 0.5 h |
| TFAM2, MG824985        | Transcription factor A, mitochondrial isoform 2       |       | Pr12088/Pr12089, pST9320                              | Yes | 37 °C 220 rpm 0.5 h |
| UNG1, MG824986         | Uracil-DNA glycosylase isoform 1                      |       | Pr12090/Pr12091, pST9321                              | Yes | 37 °C 220 rpm 0.5 h |
| STAR, MG824987         | Steroidogenic acute regulatory protein, mitochondrial |       | Pr12092/Pr12093, pST9322                              | Yes | 37 °C 220 rpm 0.5 h |
| GAPDH, NM_0012897 45.1 | Glyceraldehyde-3-phosphate dehydrogenase              |       | Pr11626/Pr11627, pST8721                              | Yes | 37 °C 220 rpm 0.5 h |

<sup>1</sup>*Francisella* and *E. coli* genes are available under the GenBank accessions NC\_007880 (LVS genome) and NC\_000913 (MG1655 genome).

<sup>2</sup>Quantitative abundance ratio of the protein in the  $\Delta lon$  mutant vs. LVS.

<sup>3</sup>Primer set used to amplify the target genes.

<sup>4</sup>pACYCDuet and pEDL17 derivatives containing the target genes.

<sup>5</sup>Degradable or undegradable by fLon in *E. coli*.

<sup>6</sup>Induction condition for each target gene.

**Table S4. The biochemical characteristics of *Francisella* Lon substrates**

| Gene                    | Description                                                | Length <sup>1</sup> | Nonpolar AAs composition <sup>2</sup> | Aromatic AAs composition <sup>3</sup> | Cellular localization <sup>4</sup> |
|-------------------------|------------------------------------------------------------|---------------------|---------------------------------------|---------------------------------------|------------------------------------|
| FTL196,<br><i>lpxD</i>  | UDP-3-O-[3-hydroxymyristoyl] glucosamine N-acyltransferase | 347                 | 41.6                                  | 5.9                                   | Cytoplasm                          |
| FTL316                  | Arsenate reductase                                         | 117                 | 37.7                                  | 12.9                                  | Cytoplasm                          |
| FTL455                  | Acetyltransferase                                          | 171                 | 34.6                                  | 18.7                                  | Cytoplasm                          |
| FTL578,<br><i>ocd</i>   | Ornithine cyclodeaminase                                   | 282                 | 42.5                                  | 7.0                                   | Cytoplasm                          |
| FTL663                  | Heat shock protein                                         | 122                 | 34.3                                  | 7.3                                   | Cytoplasm                          |
| FTL964,<br><i>hslU</i>  | ATP-dependent protease ATP-binding subunit HslU            | 455                 | 42.2                                  | 3.9                                   | Cytoplasm                          |
| FTL1003,<br><i>dnaQ</i> | DNA polymerase III subunit epsilon                         | 238                 | 42                                    | 9.3                                   | Cytoplasm                          |
| FTL1034,<br><i>cysN</i> | Sulfate adenylyltransferase                                | 317                 | 38.8                                  | 7.6                                   | Cytoplasm                          |
| FTL1167                 | Hypothetical protein                                       | 173                 | 45.2                                  | 5.3                                   | Cytoplasm                          |
| FTL1216                 | Hypothetical protein                                       | 194                 | 40.7                                  | 8.7                                   | Cytoplasm                          |
| FTL1217                 | Heat shock protein                                         | 123                 | 35.8                                  | 7.6                                   | Cytoplasm                          |
| FTL1218                 | PAS fold family protein                                    | 329                 | 39.8                                  | 10.4                                  | Cytoplasm                          |
| FTL1228,<br><i>sufD</i> | SufS activator complex, SufD subunit                       | 381                 | 41.1                                  | 9.1                                   | Cytoplasm                          |
| FTL1935                 | ABC transporter ATP-binding protein                        | 225                 | 40.9                                  | 8.9                                   | Cytoplasm                          |
| FTL1957                 | Heat shock protein                                         | 142                 | 31.6                                  | 9.1                                   | Cytoplasm                          |

<sup>1</sup>The total amino acids number of each protein.

<sup>2</sup>Percentage of the nonpolar amino acids (Ala, Val, Leu, Ile, Pro, Phe, Trp, and Met) in each protein.

<sup>3</sup>Percentage of the aromatic amino acids (Tyr, Phe, and Trp) in each protein.

<sup>4</sup>Subcellular localization of each protein is predicted based on signal peptide prediction with web-based SignalP 4.1 (<http://www.cbs.dtu.dk/services/SignalP/>) and transmembrane helices prediction with TMHMM 2.0 (<http://www.cbs.dtu.dk/services/TMHMM/>).

## REFERENCES

- 1 Su, J. *et al.* Genome-wide identification of *Francisella tularensis* virulence determinants. *Infect Immun* **75**, 3089-3101 (2007).
- 2 Guzman, L. M., Belin, D., Carson, M. J. & Beckwith, J. Tight regulation, modulation, and high-level expression by vectors containing the arabinose PBAD promoter. *J Bacteriol* **177**, 4121-4130 (1995).
- 3 LoVullo, E. D., Miller, C. N., Pavelka, M. S., Jr. & Kawula, T. H. TetR-based gene regulation systems for *Francisella tularensis*. *Appl Environ Microbiol* **78**, 6883-6889 (2012).
- 4 He, L. *et al.* The protease locus of *Francisella tularensis* LVS is required for stress tolerance and infection in the mammalian host. *Infect Immun* **84**, 1387-1402 (2016).
